# Supplementary material for: Splenic Ly6Chi monocytes contribute to adverse late post-ischemic left ventricular remodeling in heme oxygenase-1 deficient mice
Source: Springer Nature journal article supplement (doi:10.1007/s00395-017-0629-y), 2017-05-22
Supplement: MOESM3 [file 12304750]

# Supplemental Figure 2
